# Supplementary material for: Spectral and temporal differentiation between integral and contaminant chlorophyll a in the cytochrome b 6 f complex
Source: Royal Society of Chemistry journal article supplement (doi:10.1039/d5cp03433g), 2025-12-02
Supplement: d5cp03433g1.pdf [file d5cp03433g1.pdf]

# Spectral and Temporal Differentiation between Integral and Contaminant Chlorophyll *a* in the Cytochrome *b<sub>6</sub>f* Complex

Adrien A. P. Chauvet,<sup>a\*†</sup> Rachna Agarwal,<sup>b,c</sup> and William A. Cramer<sup>b</sup>

<sup>a</sup> Laboratoire de Spectroscopie Ultrarapide (LSU), ISIC, Faculté des Sciences de Base and Lausanne Centre for Ultrafast Science (LACUS), Ecole Polytechnique Fédérale de Lausanne (EPFL), Station 6, 1015 Lausanne, Switzerland.

<sup>b</sup> Department of Biological Sciences, Purdue University, West Lafayette, Indiana 47907, United States.

<sup>c</sup> Molecular Biology Division, Bhabha Atomic Research Centre, Mumbai 400 085, India

<sup>†</sup> Present Addresses: School of Mathematic and Physical Sciences, University of Sheffield, Sheffield S3 7HF (UK)

\* Corresponding Author: [a.chauvet@sheffield.ac.uk](mailto:a.chauvet@sheffield.ac.uk)

## Supplementary Information

### 1. Static absorption spectra deconvolution

By centering the pump at 515 nm, the goal is to minimize exciting carotenoid (Car) and the various hemes, while avoiding the chlorophyll (Chl) *a* Q<sub>X-Y</sub> regions. One can still appreciate that most of the pump photons are absorbed by Car, as depicted in Figure S 1.

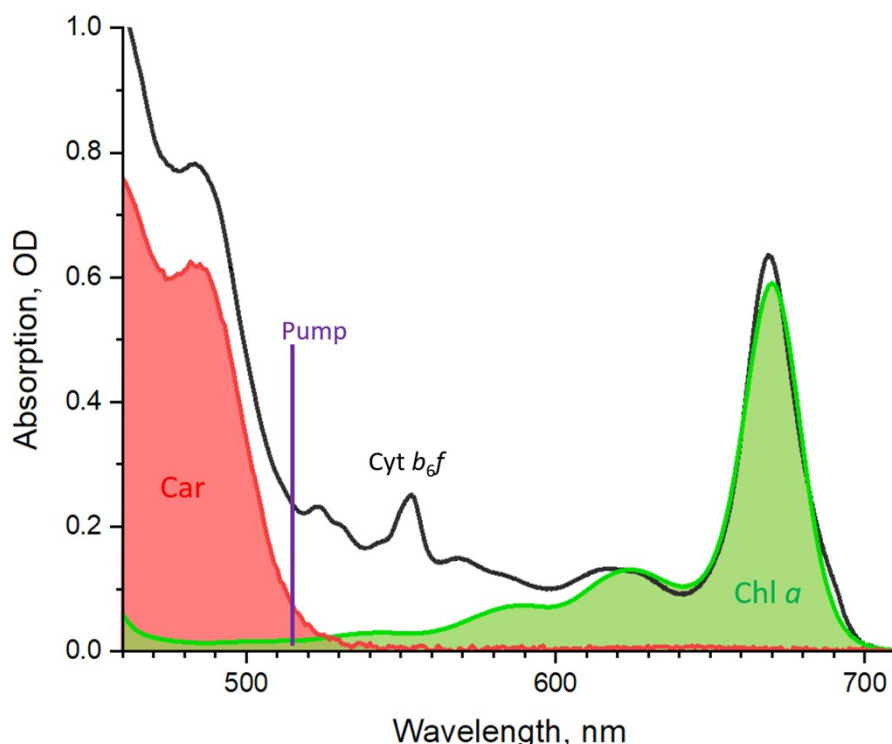

Figure S 1: Absorption of cytochrome (Cyt) *b<sub>6</sub>f* overlaid with an approximate carotenoid (Car) and chlorophyll *a* (Chl *a*) contribution, in relation to the excitation (pump) wavelength at 515 nm.

### 2. Signal amplitude estimation

This work benefits from a parallel polarization between pump and probe to enhance the monitoring of the Chl *a* signal. The goal is to estimate how amplified is the monitoring of transient signal in a parallel configuration ( $S_{=}$ ) with respect to signals monitored in a typical magic angle configuration ( $S_{MA}$ ):

$$\frac{S_{=}}{S_{MA}} \#(1)$$

Assuming an anisotropy value of 0.4, we have:

$$\frac{(S_{=} - S_{\perp})}{S_{=} + 2S_{\perp}} = 0.4 \#(2)$$

With  $S_{\perp}$  being the signal monitored at perpendicular polarization.

The later equation can be rearranged as:

$$S_{=} = 3S_{\perp} \#(3)$$

which show that signals measured at parallel polarization are expected to be three times larger than those measured at perpendicular polarization.

Furthermore, we have:

$$S_{MA} = \frac{(S_{=} + 2S_{\perp})}{3} \#(4)$$

Which, assuming  $S_{=} = 3S_{\perp}$ , can be written as:

$$S_{MA} = \frac{(3S_{\perp} + 2S_{\perp})}{3} = \frac{5}{3}S_{\perp} \#(5)$$

Finally, combining equations (3) and (5), we have

$$\frac{S_{=}}{S_{MA}} = \frac{9}{5} = 1.8 \#(6)$$

By selecting a parallel pump-probe configuration, we can expect an enhancement factor of 1.8, with respect to usual magic angel measurements. This enhancement is significant and allows us to disentangle the otherwise buried ~684 nm Chl *a* signal.
